# Supplementary material for: Ultrathin porous hierarchically textured NiCo2O4–graphene oxide flexible nanosheets for high-performance supercapacitors
Source: Royal Society of Chemistry journal article supplement (doi:10.1039/c4nj02110j), 2015-01-01
Supplement: c4nj02110j1.pdf [file c4nj02110j1.pdf]

## Supporting information

### **Ultrathin Porous Hierarchically Textured NiCo<sub>2</sub>O<sub>4</sub>/Graphene oxide Flexible Nanosheets for High-Performance Supercapacitors**

**Elias Mitchell<sup>a</sup>, Ashley Jimenez<sup>a</sup>, Ram K. Gupta<sup>a\*</sup>, Bipin Kumar Gupta<sup>b</sup>, Karthik  
Ramasamy<sup>c</sup>, Mohammad Shahabuddin<sup>d</sup>, Sanjay R. Mishra<sup>d</sup>**

<sup>a</sup>Department of Chemistry, Pittsburg State University, 1701 S. Broadway, Pittsburg, KS 66762,  
USA

<sup>b</sup>National Physical Laboratory (CSIR), Dr K.S. Krishnan Road, New Delhi 110012, India

<sup>c</sup>The Center for Integrated Nanotechnologies, Los Alamos National Laboratory, Albuquerque,  
NM 87545, USA

<sup>d</sup>Department of Physics, The University of Memphis, Memphis, TN 38152, USA

\*Corresponding author. E-mail address: [ramguptamsu@gmail.com](mailto:ramguptamsu@gmail.com) (R.K. Gupta)

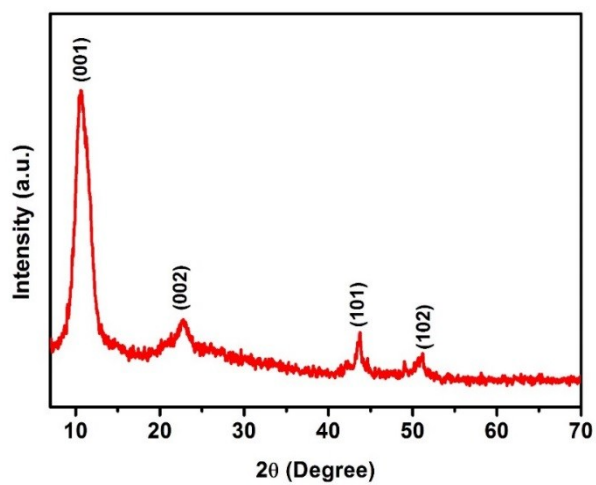

**Figure S1:** XRD patterns of the synthesized GO.

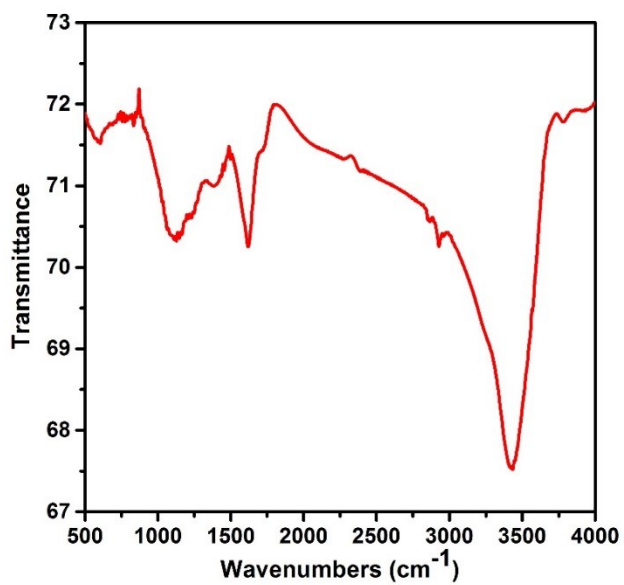

**Figure S2:** FT-IR spectra of the synthesized GO.

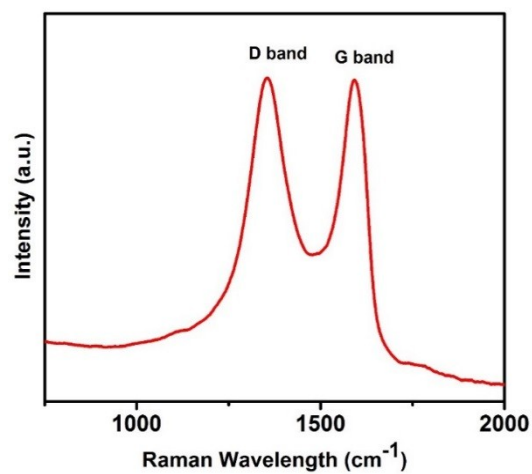

**Figure S3:** Raman spectra of synthesized GO.

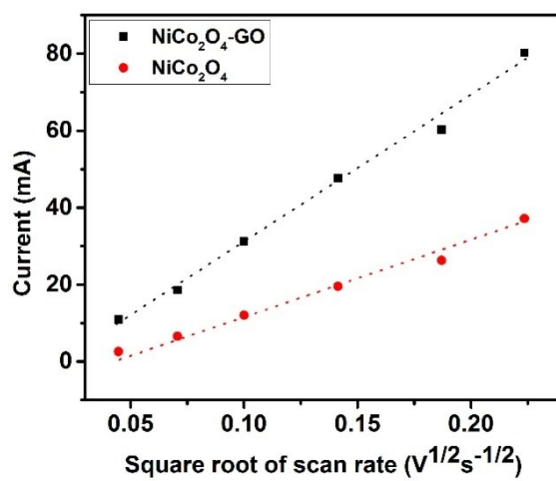

**Figure S4:** Current versus square root of scan rate for (a) NiCo<sub>2</sub>O<sub>4</sub> and (b) NiCo<sub>2</sub>O<sub>4</sub>-GO (dotted line is guide to eye).
